# Supplementary material for: Impact of seawater sulfate concentration on sulfur concentration and isotopic composition in calcite of two cultured benthic foraminifera
Source: Copernicus journal article supplement (doi:10.5194/bg-20-5177-2023), 2023-12-21
Supplement: Supplementary file 1 [file bg-20-5177-2023-supplement.zip]

Archive with 2 entries (2 files):
- supplementary table JCHESS modelling.xlsx
- bg-20-5177-2023-supplement-title-page.pdf
