# Supplementary material for: Impact of seawater sulfate concentration on sulfur concentration and isotopic composition in calcite of two cultured benthic foraminifera
Source: Copernicus journal article supplement (doi:10.5194/bg-20-5177-2023), 2023-12-21
Supplement: Supplementary file 1 [file bg-20-5177-2023-supplement.zip › bg-20-5177-2023-supplement-title-page.pdf]

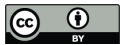

*Supplement of*

**Impact of seawater sulfate concentration on sulfur concentration and isotopic composition in calcite of two cultured benthic foraminifera**

**Caroline Thaler et al.**

*Correspondence to:* Caroline Thaler (thaler.caroline@gmail.com)

- [bg-20-5177-2023-supplement-title-page.pdf](#)
- [supplementary table JCHESS modelling.xlsx](#)

The copyright of individual parts of the supplement might differ from the article licence.
