# Supplementary material for: Impact of seawater sulfate concentration on sulfur concentration and isotopic composition in calcite of two cultured benthic foraminifera
Source: Copernicus journal article supplement (doi:10.5194/bg-20-5177-2023), 2023-12-21
Supplement: Supplementary file 1 [file supplementary table JCHESS modelling.xlsx]

## Sheet: model 5mM
Table S1. Geochemical modeling run on JCHESS for the 5mM concentration
	Volume of ASW0:	0.972222	[Cl-] in ASW0:	612	[Na+] in ASW0:	479
	Volume of ASW180:	0.0277778	[Cl-] in ASW180:	175	[Na+] in ASW180:	402
	[Na+]:	476.861	[SO42-]	5
	[Cl-]:	599.861
		Calculated		Measured			JCHESS model output (mol/L)											INPUT (modified from base seawater) (mmol/l)				Base solution seawater(Kester et al., 1967)
		SO42-/CO32-	CaSO4/CaHCO3+	Days	pH	DIC mM	Ca2+	SO42-	CaSO4	NaSO4-	MgSO4	HCO3-	CO32-	CO2(aq)	CaHCO3+	electrical imbalance (eq/L)	pH modeled	Na	HCO3-	OH		Cl	600
	Starting solution	61.3755	3.4063		8.2		0.0092077	0.0017241	0.00017163	0.001532	0.0015321	0.0016583	2.8091e-05	1.8222e-05	5.0386e-05	-0.000492	8.20157	477.27	2.8	0.27		SO42-	5
5		42.6637	2.32518	14	8.19	4.1	0.0091684	0.0017263	0.00017111	0.0015329	0.0015294	0.0024324	4.0463e-05	2.7217e-05	7.359e-05	-0.001862	8.19369	477.27	4.1	0.34		Na	477
																						k+	9.97
																						HCO3-	2.38
																						Br	0.84
																						B(OH)3	0.42
																						F-	0.071
																						Mg2+	53.12
																						Ca2+	9.91
																						Sr	0.0945
																						at 20°C
																						TDS
																						0.035964	Kg/Kg

## Sheet: model 10mM
Table S2. Geochemical modeling run on JCHESS for the 10mM concentration
	Volume of ASW0:	0.944444	[Cl-] in ASW0:	612	[Na+] in ASW0:	479	[Na+]	474.722	Final [SO42-]	10
	Volume of ASW180:	0.0555556	[Cl-] in ASW180:	175	[Na+] in ASW180:	402	[Cl-]	587.722
		Calculated		Measured			JCHESS model output (mol/L)											INPUT (modified from base seawater) (mmol/l)				Base solution seawater(Kester et al., 1967)
		SO42-/CO32-	CaSO4/CaHCO3+	Days	pH	DIC mM	Ca2+	SO42-	CaSO4	NaSO4-	MgSO4	HCO3-	CO32-	CO2(aq)	CaHCO3+	electrical imbalance (eq/L)	pH modeled	Na	HCO3-	OH		Cl	587.09
	Starting solution	143.502	8.06353		8.2		0.0090698	0.0034848	0.0003417	0.0030754	0.0030172	0.0014159	2.4284e-05	1.5367e-05	4.2376e-05	0.000603	8.20695	475.01	2.38	0.245		SO42-	28.2
				0	8.08													475.01				Na	474.765
10		166.951	5.35668	6	7.96	3.5	0.009057	0.0034871	0.00034144	0.0030757	0.0030149	0.0021328	2.0887e-05	4.0537e-05	6.3741e-05	-0.000432	7.96359	475.01	3.5	0.16		k+	9.97
				7	8.19													475.01				HCO3-	2.38
10		180.271	4.91584	13	7.89	3.8	0.0090543	0.0034877	0.0003414	0.0030758	0.0030143	0.0023245	1.9347e-05	5.1982e-05	6.9449e-05	-0.000702	7.89296	475.01	3.8	0.13		Br	0.84
				14	8.19													475.01				B(OH)3	0.42
10		137.584	5.9181	25	8.09	3.2	0.0090553	0.0034868	0.00034135	0.003076	0.003015	0.0019303	2.5343e-05	2.7366e-05	5.7679e-05	-0.000192	8.09091	475.01				F-	0.071
10		127.541	5.25197	35	8.07	3.6	0.0090459	0.003488	0.00034111	0.0030764	0.0030136	0.0021759	2.7348e-05	3.2222e-05	6.4949e-05	-0.000597	8.07197	475.01				Mg2+	53.12
																						Ca2+	9.91
																						Sr	0.0945
																						at 20°C
																						TDS
																						0.035896	Kg/Kg

## Sheet: model 28mM
Table S3. Geochemical modeling run on JCHESS for the 28mM concentration
		Calculated		Measured			JCHESS model output (mol/L)											INPUT (modified from base seawater) (mmol/l)				Base solution seawater(Kester et al., 1967)
		SO42-/CO32-	CaSO4/CaHCO3+	Days	pH	DIC mM	Ca2+	SO42-	CaSO4	NaSO4-	MgSO4	HCO3-	CO32-	CO2(aq)	CaHCO3+	electrical inblanace	pH modeled	Na	HCO3-	OH		Cl	543.879
	Starting solution	418.806	23.1648		8.2		0.0085327	0.010213	0.00094209	0.0087916	0.0080212	0.0014444	2.4386e-05	1.5925e-05	4.0669e-05	-1e-06	8.20012	467.58	2.38	0.23		SO42-	28.2
				0	8.1																	Na	467.35
28.2		343.699	13.9459	6	8.06	3.9	0.0085035	0.010224	0.0009399	0.0087945	0.0080089	0.0024019	2.9747e-05	3.6098e-05	6.7396e-05	-0.001511	8.06557	467.58	3.9	0.22		k+	9.97
				7	8.19																	HCO3-	2.38
28.2		387.94	13.8871	13	8.01	3.9	0.0085078	0.010223	0.00094031	0.0087937	0.0080102	0.0024119	2.6352e-05	4.1088e-05	6.7711e-05	-0.001478	8.01113	467.58	3.9	0.187		Br	0.84
				14	8.19																	B(OH)3	0.42
28.2		284.684	13.3456	25	8.13	4.1	0.0084926	0.010227	0.00093897	0.0087961	0.0080053	0.0025107	3.5924e-05	3.266e-05	7.0358e-05	-0.001761	8.12827	467.58	4.1	0.27		F-	0.071
28.2		319.28	14.3718	35	8.11	3.8	0.008502	0.010224	0.00093974	0.0087949	0.0080088	0.0023307	3.2022e-05	3.1576e-05	6.5388e-05	-0.001436	8.11063	467.58	3.8	0.245		Mg2+	53.12
																						Ca2+	9.91
																						Sr	0.0945
																						TDS
																						0.035962

## Sheet: model 35mM
Table S4. Geochemical modeling run on JCHESS for the 35mM concentration
	Volume of ASW0:	0.805556	[Cl-] in ASW0:	612	[Na+] in ASW0:	479
	Volume of ASW180:	0.194444	[Cl-] in ASW180:	175	[Na+] in ASW180:	402
	[Na+]:	464.028	Final [SO42-]	35
	[Cl-]:	527.028
		Calculated		Measured			JCHESS model output (mol/L)											INPUT (modified from base seawater) (mmol/l)				Base solution seawater(Kester et al., 1967)
		SO42-/CO32-	CaSO4/CaHCO3+	Days	pH	DIC mM	Ca2+	SO42-	CaSO4	NaSO4-	MgSO4	HCO3-	CO32-	CO2(aq)	CaHCO3+	electrical imbalance (eq/L)	pH modeled	Na	HCO3-	OH		Cl	527
	Starting solution	515.041	28.9851		8.2		0.0083377	0.012858	0.001159	0.01095	0.0097425	0.0014534	2.4965e-05	1.5749e-05	3.9986e-05	-7.2e-05	8.20762	464.23	2.38	0.23		SO42-	35
																						Na	464
35		382.74	19.0506	38	8.15*	3.6	0.0083097	0.01287	0.0011562	0.010954	0.0097288	0.0022134	3.3626e-05	2.7118e-05	6.0691e-05	-0.001322	8.15429					k+	9.97
																						HCO3-	2.38
																						Br	0.84
																						B(OH)3	0.42
																						F-	0.071
																						Mg2+	53.12
																						Ca2+	9.91
	*Reported from day 16																					Sr	0.0945
																						at 20°C
																						TDS
																						0.035927	Kg/Kg

## Sheet: model 40mM
Table S5. Geochemical modeling run on JCHESS for the 40mM concentration
	Volume of ASW0:	0.777778	[Cl-] in ASW0:	612	[Na+] in ASW0:	479
	Volume of ASW180:	0.222222	[Cl-] in ASW180:	175	[Na+] in ASW180:	402
	[Na+]:	461.889	Final [SO42-]	40
	[Cl-]:	514.889
		Calculated		Measured			JCHESS model output (mol/L)											INPUT (modified from base seawater) (mmol/l)				Base solution seawater(Kester et al., 1967)
		SO42-/CO32-	CaSO4/CaHCO3+	Days	pH	DIC mM	Ca2+	SO42-	CaSO4	NaSO4-	MgSO4	HCO3-	CO32-	CO2(aq)	CaHCO3+	electrical imbalance (eq/L)	pH modeled	Na	HCO3-	OH		Cl	515
	Starting solution	584.623	33.3173		8.2		0.0081966	0.014843	0.0013153	0.012552	0.010956	0.0014596	2.5389e-05	1.5619e-05	3.9478e-05	-7.2e-05	8.21307	462.23	2.38	0.23		SO42-	40
																						Na	462
40		449.381	21.8618	38	8.14*	3.6	0.0081705	0.014857	0.0013123	0.012556	0.010941	0.0022264	3.3061e-05	2.7908e-05	6.0027e-05	-0.001312	8.14438	462.23	3.6	0.25		k+	9.97
																						HCO3-	2.38
																						Br	0.84
																						B(OH)3	0.42
																						F-	0.071
																						Mg2+	53.12
																						Ca2+	9.91
		*Reported from day 16																				Sr	0.0945
																						at 20°C
																						TDS
																						0.035936	Kg/Kg

## Sheet: model 60mM
Table S6. Geochemical modeling run on JCHESS for the 60mM concentration
	Volume of ASW0:	0.666667	[Cl-] in ASW0:	612	[Na+] in ASW0:	479
	Volume of ASW180:	0.333333	[Cl-] in ASW180:	175	[Na+] in ASW180:	402
	[Na+]:	453.333	Final [SO42-]	60
	[Cl-]:	466.333
		Calculated		Measured			JCHESS model output (mol/L)											INPUT (modified from base seawater) (mmol/l)				Base solution seawater(Kester et al., 1967)
		SO42-/CO32-	CaSO4/CaHCO3+	Days	pH	DIC mM	Ca2+	SO42-	CaSO4	NaSO4-	MgSO4	HCO3-	CO32-	CO2(aq)	CaHCO3+	electrical imbalance (eq/L)	pH modeled	Na	HCO3-	OH		Cl	466
	Starting solution	909.598	50.93	0	8.2		0.0076544	0.023162	0.0019167	0.018989	0.015423	0.00149	2.5464e-05	1.6228e-05	3.7634e-05	-7.2e-05	8.20542	453.215	2.38	0.215		SO42-	60
																						Na	453
60		590.357	29.4201	25	8.15	4.1	0.0076182	0.023191	0.0019101	0.018995	0.015393	0.0025827	3.9283e-05	3.1605e-05	6.4925e-05	-0.001842	8.1548	453.215	4.1	0.265		k+	9.97
																						HCO3-	2.38
																						Br	0.84
																						B(OH)3	0.42
																						F-	0.071
																						Mg2+	53.12
																						Ca2+	9.91
																						Sr	0.0945
																						at 20°C
																						TDS
																						0.035836	Kg/Kg
